# Supplementary material for: Assessing the impact of multiple comorbidities on fatal outcome in young COVID-19
Source: bioRxiv or medRxiv preprint supplement (doi:10.1101/2021.03.29.21254599), 2021-03-31
Supplement: Supplementary file [file media-1.pdf]

## Supplementary Material

**Supplementary Table 1 – Effect of comorbid conditions on fatality in COVID-19 cases.** Here RR is relative risk, OR is odds ratio, CI is confidence interval, and CVA is cerebrovascular accident. Other abbreviations are defined in the text.

| Risk factor       | # cases | # fatalities | OR/RR for fatal outcome                                 | 95% CI                              | ref # |
|-------------------|---------|--------------|---------------------------------------------------------|-------------------------------------|-------|
| Hypertension      | 2389    | 151          | 3.48 (all) (OR)<br>6.43 (<50 years)<br>2.66 (>50 years) | 1.72-7.08<br>3.4-12.17<br>1.27-5.57 | 1     |
|                   | 6560    | 799          | 2.21 (RR)                                               | 1.74-2.81                           | 2     |
| Diabetes Mellitus | 1985    | 423          | 2.12 (RR)                                               | 1.44-3.11                           | 3     |
| CVS               | 1170    | 75           | 2.25 (RR)                                               | 1.53-3.29                           |       |
| CVA               | 1337    | 75           | 2.25 (RR)                                               | 1.51-3.36                           | 4     |
| COPD/ non COPD    | 10/157  | 6/86         | 1.1 (RR)                                                | 0.6-1.8                             | 5     |

1. Zhang J, Wu J, Sun X, Xue H, Shao J, Cai W, et al. Associations of hypertension with the severity and fatality of SARS-CoV-2 infection: A meta-Analysis. *Epidemiol Infect* 2020. doi.org/10.1017/S095026882000117X (accessed 19 June 2020).
2. Pranata R, Lim MA, Huang I, Raharjo SB, Lukito AA. Hypertension is associated with increased mortality and severity of disease in COVID-19 pneumonia: A systematic review, meta-analysis and meta-regression. *J Renin-Angiotensin-Aldosterone Syst* 2020;21(2). doi.org/10.1177/1470320320926899
3. Huang I, Lim MA, Pranata R. Diabetes mellitus is associated with increased mortality and severity of disease in COVID-19 pneumonia e A systematic review, metaanalysis, and meta-regression. *Diabetes Metab Syndr Clin Res Rev* 2020;14(4):395–403. doi.org/10.1016/j.dsx.2020.04.018
4. Pranata R, Huang I, Lim MA, Wahjoepramono EJ, July J. Impact of cerebrovascular and cardiovascular diseases on mortality and severity of COVID-19—systematic review, meta-analysis, and meta-regression. *J Stroke Cerebrovasc Dis* 2020;29(8);104949. doi.org/10.1016/j.jstrokecerebrovasdis.2020.104949
5. Alqahtani JS, Oyelade T, Aldhahir AM, Alghamdi SM, Almehmadi M, Alqahtani AS, et al. Prevalence , Severity and Mortality associated with COPD and Smoking in patients with COVID-19: A Rapid Systematic Review and Meta-Analysis. *PLoS One* 2020. https://doi.org/10.1371/journal.pone.0233147 (accessed 19 June 2020).
